# Supplementary material for: Islet-enriched gene expression and glucose-induced insulin secretion in human and mouse islets
Source: Springer Nature journal article supplement (doi:10.1007/s00125-011-2369-0), 2011-12-13
Supplement: MOESM8 [file 8090462]

**Supplemental Table 1. Primers used for quantitative RT-PCR purchased from Applied Biosystems**

| Primer          | Catalogue Information |               |
|-----------------|-----------------------|---------------|
|                 | Human                 | Mouse         |
| Insulin         | Hs00356618 ml         |               |
| Insulin I       |                       | Mm01259683 gl |
| Insulin II      |                       | Mm00731595 gh |
| Glucagon        | Hs00174967 ml         | Mm00801712 ml |
| Somatostatin    | Hs00356144 ml         | Mm00436671 ml |
| IAPP            | Hs00169095 ml         | Mm00439403 ml |
| GCK             | Hs00277220 ml         | Mm00439129 ml |
| GLUT-1          | Hs00197884 ml         | Mm00441473 ml |
| GLUT-2          | Hs00165775 ml         | Mm00446224 ml |
| Pdx1            | Hs00426216 ml         | Mm00435565 ml |
| MafA            | Hs01651425 sl         | Mm00845209 sl |
| MafB            | Hs00534343 sl         | Mm00627481 sl |
| AMY2A           | Hs00420710 gl         | Mm02342487 gl |
| BAD             | Hs00188930 ml         | Mm00432042 ml |
| BAX             | Hs00180269 ml         | Mm00432050 ml |
| BID             | Hs00609632 ml         | Mm00626981 ml |
| BCL2            | Hs00153350 ml         | Mm00477631 ml |
| BCL2L1 (bcl-xl) | Hs00236329 ml         | Mm00437783 ml |
| DDIT3 (Chop)    | Hs01090850 ml         | Mm00492097 ml |
| 18S             | Hs99999901s1          | Hs99999901s1  |
| Actin           | Hs99999903 ml         | Mm00607939 sl |
| TFRC            | Hs99999911 ml         | Mm00441941 ml |
| TBP             | Hs99999910 ml         | Mm00446973 ml |
