# Supplementary material for: Islet-enriched gene expression and glucose-induced insulin secretion in human and mouse islets
Source: Springer Nature journal article supplement (doi:10.1007/s00125-011-2369-0), 2011-12-13
Supplement: MOESM9 [file 8090462]

**Supplemental Table 2. Antibodies used for immunocytochemistry and immunoblotting**

| <b>Antigen</b>      | <b>Species</b> | <b>Source</b>  | <b>Catalog #</b> | <b>ICC</b>              | <b>Western blot</b> |
|---------------------|----------------|----------------|------------------|-------------------------|---------------------|
| <b>Insulin</b>      | Guinea pig     | Linco          | 4011-01F         | h (1:1000); m (1:200)   | N/A                 |
| <b>Glucagon</b>     | Guinea pig     | Linco          | 4031-01          | h (1:2000); m (1:10000) | N/A                 |
| <b>Somatostatin</b> | sheep          | ARP            | 13-2366          | h, m (1:500)            | N/A                 |
| <b>MafA</b>         | Rabbit         | Bethyl         | BL1225           | h (1:5000); m (1:50000) | h, m (1:5000)       |
| <b>MafB</b>         | Rabbit         | Bethyl         | BL1228           | h (1:4000)              | h (1:5000)          |
| <b>MafB</b>         | Rabbit         | Bethyl         | BL658            | m (1:10000)             | m (1:5000)          |
| <b>Pdx1</b>         | Rabbit         | from C. Wright |                  | h, m (1:10000)          | h, m (1:5000)       |
| <b>a-Amylase</b>    | Rabbit         | Sigma          | A8273            | h,m (1:2000)            | NA                  |
| <b>GAPDH</b>        | Mouse          | Santa Cruz     | SC-32233         | N/A                     | h (1:2000)          |

m- mouse samples; h - human samples; N/A - not performed
