# Supplementary figures and images for: Islet-enriched gene expression and glucose-induced insulin secretion in human and mouse islets
Source: Springer Nature journal article supplement (doi:10.1007/s00125-011-2369-0), 2011-12-13

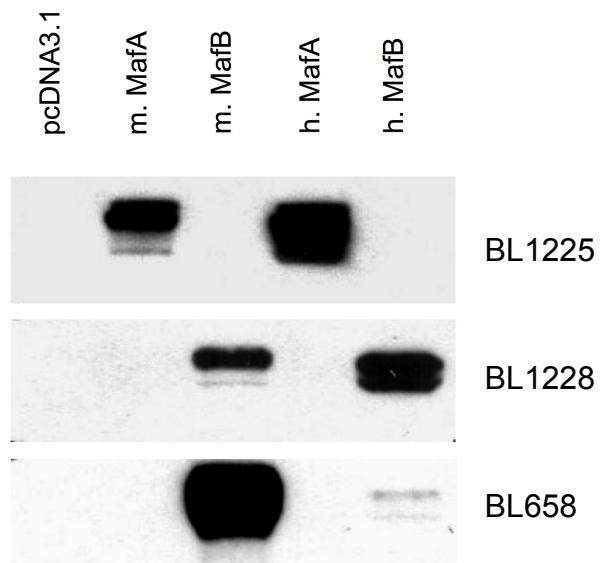

**ESM Figure 1**

Supplement: MOESM3 [file 8090462]

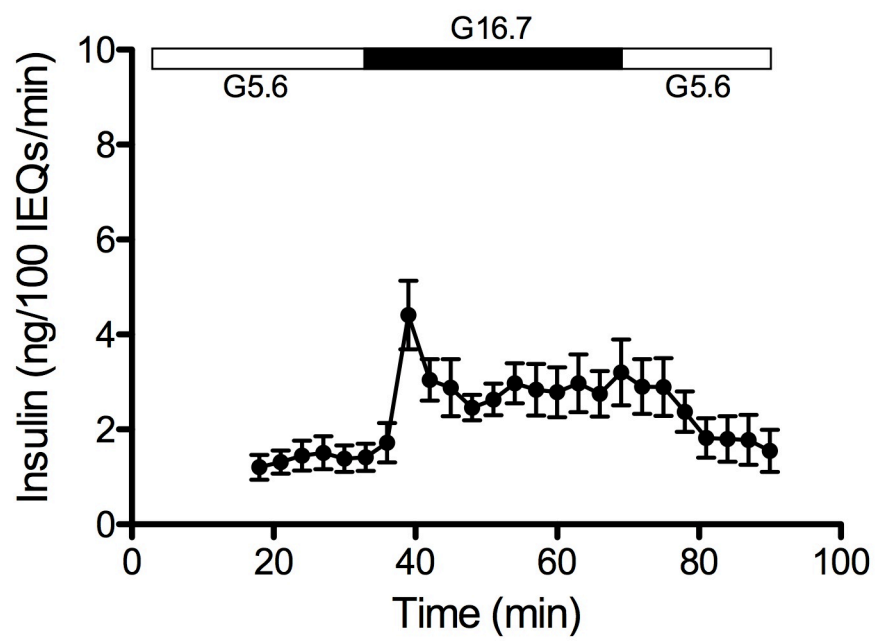

ESM Figure 2

Supplement: MOESM4 [file 8090462]

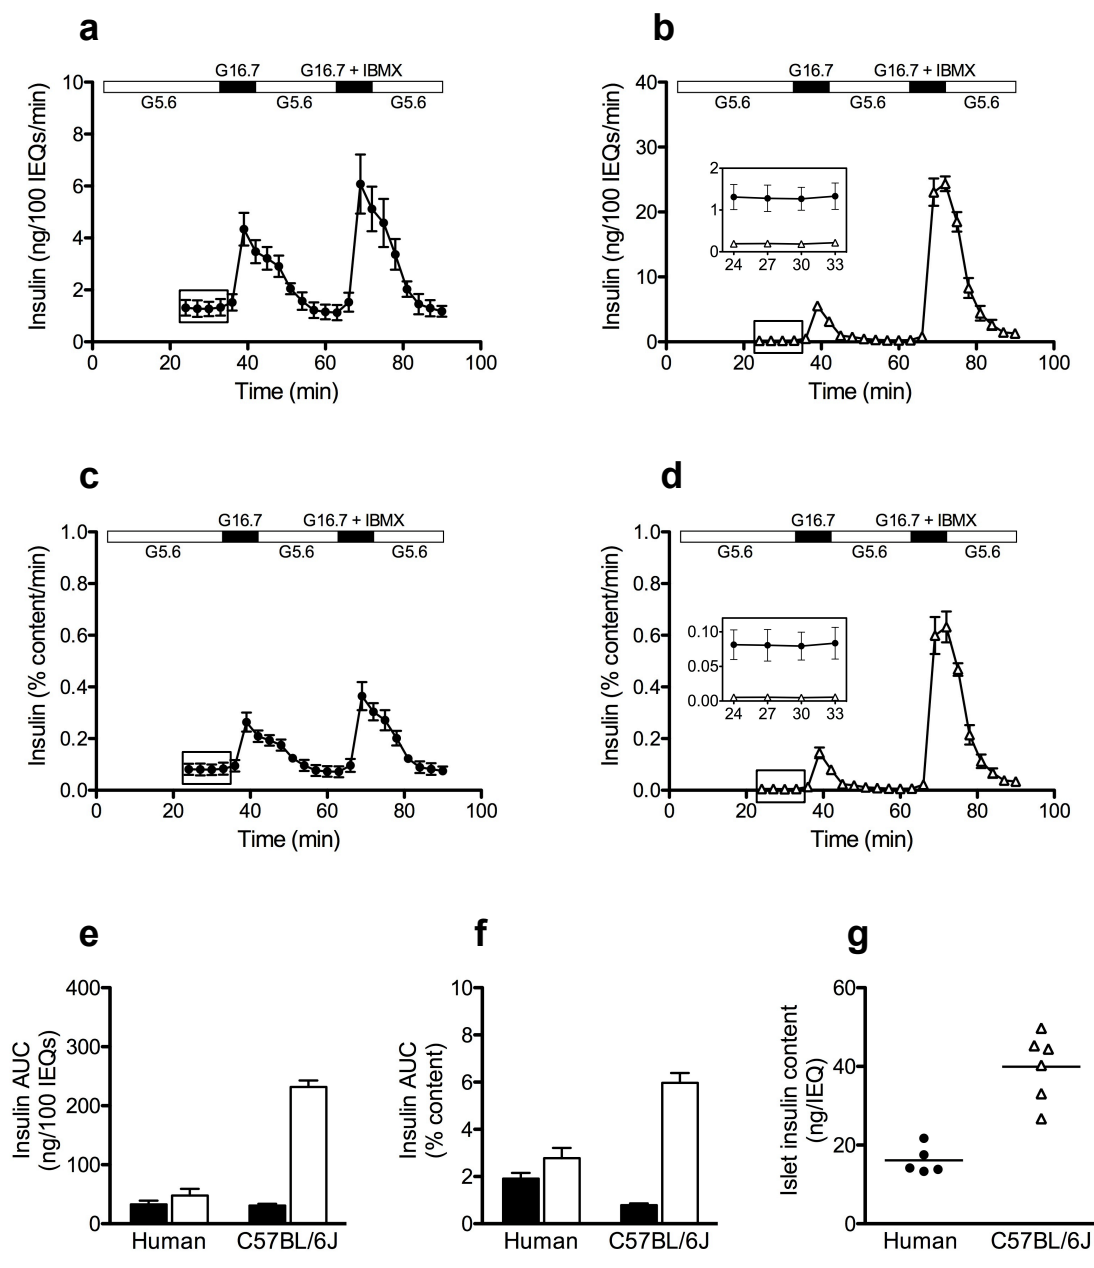

**ESM Figure 3**

Supplement: MOESM5 [file 8090462]

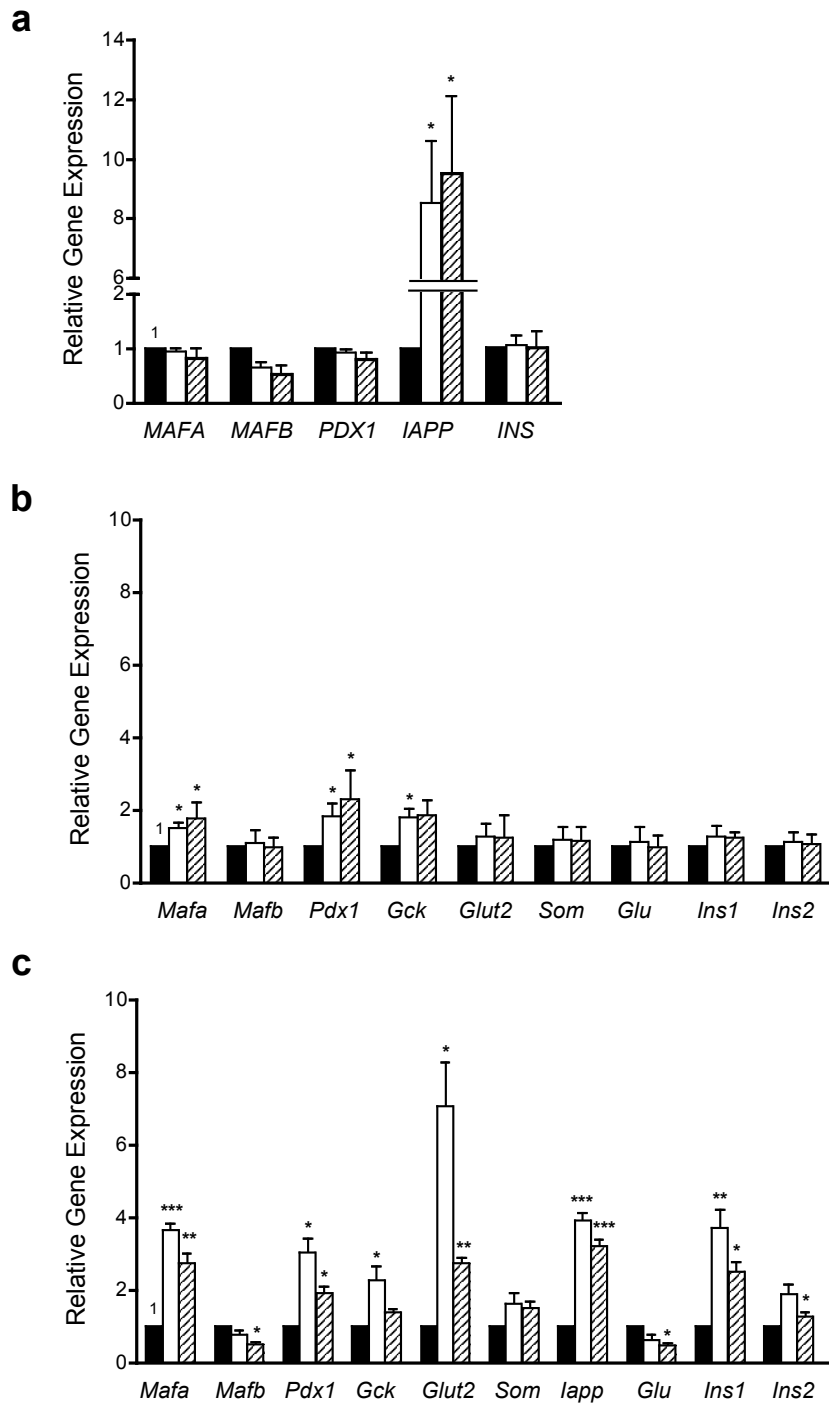

ESM Figure 4

Supplement: MOESM6 [file 8090462]
